# Supplementary material
Source: publisher figshare collection journal article supplement (https://gsajournals.figshare.com/ndownloader/files/17991338)
Supplement: Supplementary file 1 [file 17991338]

## Sheet: Feuil1
Table. Sordariaceae genomes. rcd-1+: rcd-1 homologs found; rcd-1-: rcd-1 homologs not found; if numeric, between parenthesis is the number of homologs; if not numeric, between parenthesis is: NH (no hits), PS (premature stop), BS (part of a bigger in size protein)
Original ID	Publication ID	Sordariales family	Genus	Species	Lineage	rcd-1 genotype	Reference	Assembly URL
Chaco-CCMF-232	CCMF-232	Chaetomiaceae	Chaetomium	cochliodes		rcd-1+ (2)	Zamocky et al. 2016	https://www.ncbi.nlm.nih.gov/Traces/wgs/LSBY01?display=contigs
Chagl-CBS148.51	CBS148.51	Chaetomiaceae	Chaetomium	globosum		rcd-1+	Cuomo et al. 2015	https://www.ncbi.nlm.nih.gov/nuccore?term=CH408029:CH408042[PACC]
Chath-DSM1495	DSM1495	Chaetomiaceae	Chaetomium	thermophilum		rcd-1- (NH)	Amlacher et al. 2011
Clabu-DJ3	DJ3	Lasiosphaeriaceae IV	Cladorrhinum	bulbillosum		rcd-1+ (7)	Walton et al. Unpublished
Madmy-MM55	MM55	Chaetomiaceae	Madurella	mycetomatis		rcd-1+	Smit et al. 2016	https://www.ncbi.nlm.nih.gov/Traces/wgs/LCTW02?display=contigs
Mycfe-CBS405.69	CBS405.69	Chaetomiaceae	Myceliophthora	fergusii		rcd-1- (NH)	Morgenstern et al. 2012
Myche-CBS202.75	CBS202.75	Chaetomiaceae	Myceliophthora	heterothallica		rcd-1- (NH)	Hutchinson et al. 2016
Myche-CBS203.75	CBS203.75	Chaetomiaceae	Myceliophthora	heterothallica		rcd-1- (NH)	Hutchinson et al. 2016
Mycth-ATCC42464	ATCC42464	Chaetomiaceae	Myceliophthora	thermophila		rcd-1- (NH)	Berka et al. 2011
Myrth-CBS398.93	CBS398.93	Chaetomiaceae	Myriococcum	thermophilum		rcd-1+	Morgenstern et al. 2012
Nafr-1740	FGSC1740	Lasiosphaeriaceae II	Neurospora	africana		rcd-1+	Gioti et al. 2013	https://www.ncbi.nlm.nih.gov/nuccore?term=HF970591:HF972568[PACC]
Ncra-D111	D111	Lasiosphaeriaceae II	Neurospora	crassa		rcd-1+	Zhao et al. 2015	https://www.ncbi.nlm.nih.gov/sra/SRP052921
Ncra-D112	D112	Lasiosphaeriaceae II	Neurospora	crassa		rcd-1+	Zhao et al. 2015	https://www.ncbi.nlm.nih.gov/sra/SRP052921
Ncra-D113	D113	Lasiosphaeriaceae II	Neurospora	crassa		rcd-1+	Zhao et al. 2015	https://www.ncbi.nlm.nih.gov/sra/SRP052921
Ncra-D30	D30	Lasiosphaeriaceae II	Neurospora	crassa		rcd-1+	Zhao et al. 2015	https://www.ncbi.nlm.nih.gov/sra/SRP052921
Ncra-JW148	JW148	Lasiosphaeriaceae II	Neurospora	crassa		rcd-1+	Zhao et al. 2015	https://www.ncbi.nlm.nih.gov/sra/SRP052921
Ncra-JW179	JW179	Lasiosphaeriaceae II	Neurospora	crassa		rcd-1+	Zhao et al. 2015	https://www.ncbi.nlm.nih.gov/sra/SRP052921
Ncra-JW193	JW193	Lasiosphaeriaceae II	Neurospora	crassa		rcd-1+	Zhao et al. 2015	https://www.ncbi.nlm.nih.gov/sra/SRP052921
Ncra-JW196	JW196	Lasiosphaeriaceae II	Neurospora	crassa		rcd-1+	Zhao et al. 2015	https://www.ncbi.nlm.nih.gov/sra/SRP052921
Ncra-JW199	JW199	Lasiosphaeriaceae II	Neurospora	crassa		rcd-1+	Zhao et al. 2015	https://www.ncbi.nlm.nih.gov/sra/SRP052921
Ncra-JW204	JW204	Lasiosphaeriaceae II	Neurospora	crassa		rcd-1+	Zhao et al. 2015	https://www.ncbi.nlm.nih.gov/sra/SRP052921
Ncra-JW22	JW22	Lasiosphaeriaceae II	Neurospora	crassa		rcd-1+	Zhao et al. 2015	https://www.ncbi.nlm.nih.gov/sra/SRP052921
Ncra-JW220	JW220	Lasiosphaeriaceae II	Neurospora	crassa		rcd-1+	Zhao et al. 2015	https://www.ncbi.nlm.nih.gov/sra/SRP052921
Ncra-JW222	JW222	Lasiosphaeriaceae II	Neurospora	crassa		rcd-1+	Zhao et al. 2015	https://www.ncbi.nlm.nih.gov/sra/SRP052921
Ncra-JW224	JW224	Lasiosphaeriaceae II	Neurospora	crassa		rcd-1+	Zhao et al. 2015	https://www.ncbi.nlm.nih.gov/sra/SRP052921
Ncra-JW228	JW228	Lasiosphaeriaceae II	Neurospora	crassa		rcd-1+	Zhao et al. 2015	https://www.ncbi.nlm.nih.gov/sra/SRP052921
Ncra-JW242	JW242	Lasiosphaeriaceae II	Neurospora	crassa		rcd-1+	Zhao et al. 2015	https://www.ncbi.nlm.nih.gov/sra/SRP052921
Ncra-JW246	JW246	Lasiosphaeriaceae II	Neurospora	crassa		rcd-1+	Zhao et al. 2015	https://www.ncbi.nlm.nih.gov/sra/SRP052921
Ncra-JW258	JW258	Lasiosphaeriaceae II	Neurospora	crassa		rcd-1+	Zhao et al. 2015	https://www.ncbi.nlm.nih.gov/sra/SRP052921
Ncra-JW75	JW75	Lasiosphaeriaceae II	Neurospora	crassa		rcd-1+	Zhao et al. 2015	https://www.ncbi.nlm.nih.gov/sra/SRP052921
Ncra-OR74A	OR74A	Lasiosphaeriaceae II	Neurospora	crassa		rcd-1+	Zhao et al. 2015	https://www.ncbi.nlm.nih.gov/sra/SRP052921
Ncra-P4452	P4452	Lasiosphaeriaceae II	Neurospora	crassa		rcd-1+	Zhao et al. 2015	https://www.ncbi.nlm.nih.gov/sra/SRP052921
Ncra-P4463	P4463	Lasiosphaeriaceae II	Neurospora	crassa		rcd-1+	Zhao et al. 2015	https://www.ncbi.nlm.nih.gov/sra/SRP052921
Ncra-P4468	P4468	Lasiosphaeriaceae II	Neurospora	crassa		rcd-1+	Zhao et al. 2015	https://www.ncbi.nlm.nih.gov/sra/SRP052921
Ncra-P4471	P4471	Lasiosphaeriaceae II	Neurospora	crassa		rcd-1+	Zhao et al. 2015	https://www.ncbi.nlm.nih.gov/sra/SRP052921
Ncra-P4476	P4476	Lasiosphaeriaceae II	Neurospora	crassa		rcd-1+	Zhao et al. 2015	https://www.ncbi.nlm.nih.gov/sra/SRP052921
Ncra-P4479	P4479	Lasiosphaeriaceae II	Neurospora	crassa		rcd-1+	Zhao et al. 2015	https://www.ncbi.nlm.nih.gov/sra/SRP052921
Ncra-P4489	P4489	Lasiosphaeriaceae II	Neurospora	crassa		rcd-1+	Zhao et al. 2015	https://www.ncbi.nlm.nih.gov/sra/SRP052921
Ndis-MM10	MM10	Lasiosphaeriaceae II	Neurospora	discreta PS4	AKEU	rcd-1+	Gladieux et al. 2015	https://www.ncbi.nlm.nih.gov/sra?linkname=bioproject_sra_all&from_uid=295117
Ndis-MM12-3	MM12-3	Lasiosphaeriaceae II	Neurospora	discreta PS4	AKEU	rcd-1+	Gladieux et al. 2015	https://www.ncbi.nlm.nih.gov/sra?linkname=bioproject_sra_all&from_uid=295117
Ndis-MM16-1	MM16-1	Lasiosphaeriaceae II	Neurospora	discreta PS4	AKEU	rcd-1- (BS)	Gladieux et al. 2015	https://www.ncbi.nlm.nih.gov/sra?linkname=bioproject_sra_all&from_uid=295117
Ndis-MM2-3	MM2-3	Lasiosphaeriaceae II	Neurospora	discreta PS4	AKEU	rcd-1+	Gladieux et al. 2015	https://www.ncbi.nlm.nih.gov/sra?linkname=bioproject_sra_all&from_uid=295117
Ndis-MM20	MM20	Lasiosphaeriaceae II	Neurospora	discreta PS4	AKEU	rcd-1+	Gladieux et al. 2015	https://www.ncbi.nlm.nih.gov/sra?linkname=bioproject_sra_all&from_uid=295117
Ndis-MM31-2	MM31-2	Lasiosphaeriaceae II	Neurospora	discreta PS4	AKEU	rcd-1+	Gladieux et al. 2015	https://www.ncbi.nlm.nih.gov/sra?linkname=bioproject_sra_all&from_uid=295117
Ndis-MM6-1	MM6-1	Lasiosphaeriaceae II	Neurospora	discreta PS4	AKEU	rcd-1+	Gladieux et al. 2015	https://www.ncbi.nlm.nih.gov/sra?linkname=bioproject_sra_all&from_uid=295117
Ndis-W1289-1	W1289-1	Lasiosphaeriaceae II	Neurospora	discreta PS4	AKEU	rcd-1+	Gladieux et al. 2015	https://www.ncbi.nlm.nih.gov/sra?linkname=bioproject_sra_all&from_uid=295117
Ndis-W1303-3	W1303-3	Lasiosphaeriaceae II	Neurospora	discreta PS4	AKEU	rcd-1- (BS)	Gladieux et al. 2015	https://www.ncbi.nlm.nih.gov/sra?linkname=bioproject_sra_all&from_uid=295117
Ndis-W1050-4	W1050-4	Lasiosphaeriaceae II	Neurospora	discreta PS4	CAWA	rcd-1- (BS)	Gladieux et al. 2015	https://www.ncbi.nlm.nih.gov/sra?linkname=bioproject_sra_all&from_uid=295117
Ndis-W1056-1	W1056-1	Lasiosphaeriaceae II	Neurospora	discreta PS4	CAWA	rcd-1+	Gladieux et al. 2015	https://www.ncbi.nlm.nih.gov/sra?linkname=bioproject_sra_all&from_uid=295117
Ndis-W1070-1	W1070-1	Lasiosphaeriaceae II	Neurospora	discreta PS4	CAWA	rcd-1- (BS)	Gladieux et al. 2015	https://www.ncbi.nlm.nih.gov/sra?linkname=bioproject_sra_all&from_uid=295117
Ndis-W1073-3	W1073-3	Lasiosphaeriaceae II	Neurospora	discreta PS4	CAWA	rcd-1+	Gladieux et al. 2015	https://www.ncbi.nlm.nih.gov/sra?linkname=bioproject_sra_all&from_uid=295117
Ndis-W1101-1	W1101-1	Lasiosphaeriaceae II	Neurospora	discreta PS4	CAWA	rcd-1+	Gladieux et al. 2015	https://www.ncbi.nlm.nih.gov/sra?linkname=bioproject_sra_all&from_uid=295117
Ndis-W1102-3	W1102-3	Lasiosphaeriaceae II	Neurospora	discreta PS4	CAWA	rcd-1+	Gladieux et al. 2015	https://www.ncbi.nlm.nih.gov/sra?linkname=bioproject_sra_all&from_uid=295117
Ndis-W1105-1	W1105-1	Lasiosphaeriaceae II	Neurospora	discreta PS4	CAWA	rcd-1- (BS)	Gladieux et al. 2015	https://www.ncbi.nlm.nih.gov/sra?linkname=bioproject_sra_all&from_uid=295117
Ndis-W1106-2	W1106-2	Lasiosphaeriaceae II	Neurospora	discreta PS4	CAWA	rcd-1- (BS)	Gladieux et al. 2015	https://www.ncbi.nlm.nih.gov/sra?linkname=bioproject_sra_all&from_uid=295117
Ndis-W1110-2	W1110-2	Lasiosphaeriaceae II	Neurospora	discreta PS4	CAWA	rcd-1+	Gladieux et al. 2015	https://www.ncbi.nlm.nih.gov/sra?linkname=bioproject_sra_all&from_uid=295117
Ndis-W967-8	W967-8	Lasiosphaeriaceae II	Neurospora	discreta PS4	CAWA	rcd-1+	Gladieux et al. 2015	https://www.ncbi.nlm.nih.gov/sra?linkname=bioproject_sra_all&from_uid=295117
Ndis-W973-5	W973-5	Lasiosphaeriaceae II	Neurospora	discreta PS4	CAWA	rcd-1+	Gladieux et al. 2015	https://www.ncbi.nlm.nih.gov/sra?linkname=bioproject_sra_all&from_uid=295117
Ndis-W978-3	W978-3	Lasiosphaeriaceae II	Neurospora	discreta PS4	CAWA	rcd-1+	Gladieux et al. 2015	https://www.ncbi.nlm.nih.gov/sra?linkname=bioproject_sra_all&from_uid=295117
Ndis-W990-3	W990-3	Lasiosphaeriaceae II	Neurospora	discreta PS4	CAWA	rcd-1- (BS)	Gladieux et al. 2015	https://www.ncbi.nlm.nih.gov/sra?linkname=bioproject_sra_all&from_uid=295117
Ndis-W992-3	W992-3	Lasiosphaeriaceae II	Neurospora	discreta PS4	CAWA	rcd-1- (BS)	Gladieux et al. 2015	https://www.ncbi.nlm.nih.gov/sra?linkname=bioproject_sra_all&from_uid=295117
Ndis-W1036-3	W1036-3	Lasiosphaeriaceae II	Neurospora	discreta PS4	NMWA	rcd-1- (BS)	Gladieux et al. 2015	https://www.ncbi.nlm.nih.gov/sra?linkname=bioproject_sra_all&from_uid=295117
Ndis-W1039-4	W1039-4	Lasiosphaeriaceae II	Neurospora	discreta PS4	NMWA	rcd-1- (BS)	Gladieux et al. 2015	https://www.ncbi.nlm.nih.gov/sra?linkname=bioproject_sra_all&from_uid=295117
Ndis-W1040-3	W1040-3	Lasiosphaeriaceae II	Neurospora	discreta PS4	NMWA	rcd-1+	Gladieux et al. 2015	https://www.ncbi.nlm.nih.gov/sra?linkname=bioproject_sra_all&from_uid=295117
Ndis-W1068-1	W1068-1	Lasiosphaeriaceae II	Neurospora	discreta PS4	NMWA	rcd-1+	Gladieux et al. 2015	https://www.ncbi.nlm.nih.gov/sra?linkname=bioproject_sra_all&from_uid=295117
Ndis-W778-5	W778-5	Lasiosphaeriaceae II	Neurospora	discreta PS4	NMWA	rcd-1+	Gladieux et al. 2015	https://www.ncbi.nlm.nih.gov/sra?linkname=bioproject_sra_all&from_uid=295117
Ndis-W781-6	W781-6	Lasiosphaeriaceae II	Neurospora	discreta PS4	NMWA	rcd-1+	Gladieux et al. 2015	https://www.ncbi.nlm.nih.gov/sra?linkname=bioproject_sra_all&from_uid=295117
Ndis-W786-2	W786-2	Lasiosphaeriaceae II	Neurospora	discreta PS4	NMWA	rcd-1- (BS)	Gladieux et al. 2015	https://www.ncbi.nlm.nih.gov/sra?linkname=bioproject_sra_all&from_uid=295117
Ndis-W791-2	W791-2	Lasiosphaeriaceae II	Neurospora	discreta PS4	NMWA	rcd-1- (BS)	Gladieux et al. 2015	https://www.ncbi.nlm.nih.gov/sra?linkname=bioproject_sra_all&from_uid=295117
Ndis-W793-3	W793-3	Lasiosphaeriaceae II	Neurospora	discreta PS4	NMWA	rcd-1+	Gladieux et al. 2015	https://www.ncbi.nlm.nih.gov/sra?linkname=bioproject_sra_all&from_uid=295117
Ndis-W794-4	W794-4	Lasiosphaeriaceae II	Neurospora	discreta PS4	NMWA	rcd-1- (BS)	Gladieux et al. 2015	https://www.ncbi.nlm.nih.gov/sra?linkname=bioproject_sra_all&from_uid=295117
Ndis-W796-5	W796-5	Lasiosphaeriaceae II	Neurospora	discreta PS4	NMWA	rcd-1+	Gladieux et al. 2015	https://www.ncbi.nlm.nih.gov/sra?linkname=bioproject_sra_all&from_uid=295117
Ndis-8765	FGSC8765	Lasiosphaeriaceae II	Neurospora	discreta PS4	PNG	rcd-1+	Gladieux et al. 2015	https://www.ncbi.nlm.nih.gov/sra?linkname=bioproject_sra_all&from_uid=295117
Ndis-9940	FGSC9940	Lasiosphaeriaceae II	Neurospora	discreta PS4	PNG	rcd-1- (BS)	Gladieux et al. 2015	https://www.ncbi.nlm.nih.gov/sra?linkname=bioproject_sra_all&from_uid=295117
Ndis-9945	FGSC9945	Lasiosphaeriaceae II	Neurospora	discreta PS4	PNG	rcd-1+	Gladieux et al. 2015	https://www.ncbi.nlm.nih.gov/sra?linkname=bioproject_sra_all&from_uid=295117
Ndis-9946	FGSC9946	Lasiosphaeriaceae II	Neurospora	discreta PS4	PNG	rcd-1- (BS)	Gladieux et al. 2015	https://www.ncbi.nlm.nih.gov/sra?linkname=bioproject_sra_all&from_uid=295117
Ndis-9947	FGSC9947	Lasiosphaeriaceae II	Neurospora	discreta PS4	PNG	rcd-1+	Gladieux et al. 2015	https://www.ncbi.nlm.nih.gov/sra?linkname=bioproject_sra_all&from_uid=295117
Ndis-9948	FGSC9948	Lasiosphaeriaceae II	Neurospora	discreta PS4	PNG	rcd-1+	Gladieux et al. 2015	https://www.ncbi.nlm.nih.gov/sra?linkname=bioproject_sra_all&from_uid=295117
Ndis-9949	FGSC9949	Lasiosphaeriaceae II	Neurospora	discreta PS4	PNG	rcd-1- (BS)	Gladieux et al. 2015	https://www.ncbi.nlm.nih.gov/sra?linkname=bioproject_sra_all&from_uid=295117
Ndis-9950	FGSC9950	Lasiosphaeriaceae II	Neurospora	discreta PS4	PNG	rcd-1+	Gladieux et al. 2015	https://www.ncbi.nlm.nih.gov/sra?linkname=bioproject_sra_all&from_uid=295117
Ndis-9951	FGSC9951	Lasiosphaeriaceae II	Neurospora	discreta PS4	PNG	rcd-1+	Gladieux et al. 2015	https://www.ncbi.nlm.nih.gov/sra?linkname=bioproject_sra_all&from_uid=295117
Ndis-9958	FGSC9958	Lasiosphaeriaceae II	Neurospora	discreta PS10		rcd-1+	Gladieux & Taylor, unpublished
Ndis-9962	FGSC9962	Lasiosphaeriaceae II	Neurospora	discreta PS5		rcd-1+	Gladieux & Taylor, unpublished
Ndis-9959	FGSC9959	Lasiosphaeriaceae II	Neurospora	discreta PS6		rcd-1+	Gladieux et al. 2015	https://www.ncbi.nlm.nih.gov/sra?linkname=bioproject_sra_all&from_uid=295117
Ndis-9941	FGSC9941	Lasiosphaeriaceae II	Neurospora	discreta PS7		rcd-1+	Gladieux & Taylor, unpublished
Ndis-9971	FGSC9971	Lasiosphaeriaceae II	Neurospora	discreta PS8		rcd-1+	Gladieux & Taylor, unpublished
Ndis-9953	FGSC9953	Lasiosphaeriaceae II	Neurospora	discreta PS9		rcd-1+	Gladieux & Taylor, unpublished
Ndis-9944	FGSC9944	Lasiosphaeriaceae II	Neurospora	discreta sensu stricto		rcd-1+	Gladieux & Taylor, unpublished
Ndis-9956	FGSC9956	Lasiosphaeriaceae II	Neurospora	discreta PS4	THA	rcd-1+	Gladieux et al. 2015	https://www.ncbi.nlm.nih.gov/sra?linkname=bioproject_sra_all&from_uid=295117
Nhis-8817	8817	Lasiosphaeriaceae II	Neurospora	hispaniola		rcd-1+ (PS)	Corcoran et al. 2016	https://www.ncbi.nlm.nih.gov/sra/?term=SRP040006
Npan-7221	FGSC7221	Lasiosphaeriaceae II	Neurospora	pannonica		rcd-1+	Gioti et al. 2013	https://www.ncbi.nlm.nih.gov/nuccore?term=232144%5BBioProject%5D
Nsit-1135	1135	Lasiosphaeriaceae II	Neurospora	sitophila		rcd-1+	Corcoran et al. 2016	https://www.ncbi.nlm.nih.gov/sra/?term=SRP040006
Nsub-5508	FGSC5508	Lasiosphaeriaceae II	Neurospora	sublineolata		rcd-1+ (BS)	Gioti et al. 2013	https://www.ncbi.nlm.nih.gov/nuccore?term=HF972687:HF975603[PACC]
Nter-1889	FGSC1889	Lasiosphaeriaceae II	Neurospora	terricola		rcd-1+	Gioti et al. 2013	https://www.ncbi.nlm.nih.gov/nuccore?term=HF979207:HF985214[PACC]
Ntet-9024	FGSC9024	Lasiosphaeriaceae II	Neurospora	tetrasperma	L1	rcd-1- (BS)	Corcoran et al. 2016	https://www.ncbi.nlm.nih.gov/sra/?term=SRP040006
Ntet-9025	FGSC9025	Lasiosphaeriaceae II	Neurospora	tetrasperma	L1	rcd-1- (BS)	Corcoran et al. 2016	https://www.ncbi.nlm.nih.gov/sra/?term=SRP040006
Ntet-9033	FGSC9033	Lasiosphaeriaceae II	Neurospora	tetrasperma	L1	rcd-1- (BS)	Corcoran et al. 2016	https://www.ncbi.nlm.nih.gov/sra/?term=SRP040006
Ntet-9034	FGSC9034	Lasiosphaeriaceae II	Neurospora	tetrasperma	L1	rcd-1- (BS)	Corcoran et al. 2016	https://www.ncbi.nlm.nih.gov/sra/?term=SRP040006
Ntet-9037C2	FGSC9037C2	Lasiosphaeriaceae II	Neurospora	tetrasperma	L1	rcd-1- (BS)	Corcoran et al. 2016	https://www.ncbi.nlm.nih.gov/sra/?term=SRP040006
Ntet-9038C2	FGSC9038C2	Lasiosphaeriaceae II	Neurospora	tetrasperma	L1	rcd-1- (BS)	Corcoran et al. 2016	https://www.ncbi.nlm.nih.gov/sra/?term=SRP040006
Ntet-10703	FGSC10703	Lasiosphaeriaceae II	Neurospora	tetrasperma	L10	rcd-1- (BS)	Corcoran et al. 2016	https://www.ncbi.nlm.nih.gov/sra/?term=SRP040006
Ntet-10704H	FGSC10704H	Lasiosphaeriaceae II	Neurospora	tetrasperma	L10	rcd-1- (BS)	Corcoran et al. 2016	https://www.ncbi.nlm.nih.gov/sra/?term=SRP040006
Ntet-10705	FGSC10705	Lasiosphaeriaceae II	Neurospora	tetrasperma	L10	rcd-1- (BS)	Corcoran et al. 2016	https://www.ncbi.nlm.nih.gov/sra/?term=SRP040006
Ntet-10706	FGSC10706	Lasiosphaeriaceae II	Neurospora	tetrasperma	L10	rcd-1- (BS)	Corcoran et al. 2016	https://www.ncbi.nlm.nih.gov/sra/?term=SRP040006
Ntet-10707	FGSC10707	Lasiosphaeriaceae II	Neurospora	tetrasperma	L10	rcd-1- (BS)	Corcoran et al. 2016	https://www.ncbi.nlm.nih.gov/sra/?term=SRP040006
Ntet-10708	FGSC10708	Lasiosphaeriaceae II	Neurospora	tetrasperma	L10	rcd-1- (BS)	Corcoran et al. 2016	https://www.ncbi.nlm.nih.gov/sra/?term=SRP040006
Ntet-10713H	FGSC10713H	Lasiosphaeriaceae II	Neurospora	tetrasperma	L10	rcd-1- (BS)	Corcoran et al. 2016	https://www.ncbi.nlm.nih.gov/sra/?term=SRP040006
Ntet-10714H	FGSC10714H	Lasiosphaeriaceae II	Neurospora	tetrasperma	L10	rcd-1- (BS)	Corcoran et al. 2016	https://www.ncbi.nlm.nih.gov/sra/?term=SRP040006
Ntet-10715	FGSC10715	Lasiosphaeriaceae II	Neurospora	tetrasperma	L10	rcd-1- (BS)	Corcoran et al. 2016	https://www.ncbi.nlm.nih.gov/sra/?term=SRP040006
Ntet-10716	FGSC10716	Lasiosphaeriaceae II	Neurospora	tetrasperma	L10	rcd-1- (BS)	Corcoran et al. 2016	https://www.ncbi.nlm.nih.gov/sra/?term=SRP040006
Ntet-10717	FGSC10717	Lasiosphaeriaceae II	Neurospora	tetrasperma	L10	rcd-1- (BS)	Corcoran et al. 2016	https://www.ncbi.nlm.nih.gov/sra/?term=SRP040006
Ntet-10723H	FGSC10723H	Lasiosphaeriaceae II	Neurospora	tetrasperma	L10	rcd-1- (BS)	Corcoran et al. 2016	https://www.ncbi.nlm.nih.gov/sra/?term=SRP040006
Ntet-10724	FGSC10724	Lasiosphaeriaceae II	Neurospora	tetrasperma	L10	rcd-1- (BS)	Corcoran et al. 2016	https://www.ncbi.nlm.nih.gov/sra/?term=SRP040006
Ntet-10725	FGSC10725	Lasiosphaeriaceae II	Neurospora	tetrasperma	L10	rcd-1- (BS)	Corcoran et al. 2016	https://www.ncbi.nlm.nih.gov/sra/?term=SRP040006
Ntet-10726	FGSC10726	Lasiosphaeriaceae II	Neurospora	tetrasperma	L10	rcd-1- (BS)	Corcoran et al. 2016	https://www.ncbi.nlm.nih.gov/sra/?term=SRP040006
Ntet-709H	FGSC709H	Lasiosphaeriaceae II	Neurospora	tetrasperma	L10	rcd-1- (PS)	Corcoran et al. 2016	https://www.ncbi.nlm.nih.gov/sra/?term=SRP040006
Ntet-710	FGSC710	Lasiosphaeriaceae II	Neurospora	tetrasperma	L10	rcd-1- (BS)	Corcoran et al. 2016	https://www.ncbi.nlm.nih.gov/sra/?term=SRP040006
Ntet-711	FGSC711	Lasiosphaeriaceae II	Neurospora	tetrasperma	L10	rcd-1- (BS)	Corcoran et al. 2016	https://www.ncbi.nlm.nih.gov/sra/?term=SRP040006
Ntet-712	FGSC712	Lasiosphaeriaceae II	Neurospora	tetrasperma	L10	rcd-1- (BS)	Corcoran et al. 2016	https://www.ncbi.nlm.nih.gov/sra/?term=SRP040006
Ntet-718	FGSC718	Lasiosphaeriaceae II	Neurospora	tetrasperma	L10	rcd-1- (BS)	Corcoran et al. 2016	https://www.ncbi.nlm.nih.gov/sra/?term=SRP040006
Ntet-719H	FGSC719H	Lasiosphaeriaceae II	Neurospora	tetrasperma	L10	rcd-1- (BS)	Corcoran et al. 2016	https://www.ncbi.nlm.nih.gov/sra/?term=SRP040006
Ntet-720H	FGSC720H	Lasiosphaeriaceae II	Neurospora	tetrasperma	L10	rcd-1- (BS)	Corcoran et al. 2016	https://www.ncbi.nlm.nih.gov/sra/?term=SRP040006
Ntet-721	FGSC721	Lasiosphaeriaceae II	Neurospora	tetrasperma	L10	rcd-1- (BS)	Corcoran et al. 2016	https://www.ncbi.nlm.nih.gov/sra/?term=SRP040006
Ntet-722	FGSC722	Lasiosphaeriaceae II	Neurospora	tetrasperma	L10	rcd-1- (BS)	Corcoran et al. 2016	https://www.ncbi.nlm.nih.gov/sra/?term=SRP040006
Ntet-7585	FGSC7585	Lasiosphaeriaceae II	Neurospora	tetrasperma	L4	rcd-1+	Corcoran et al. 2016	https://www.ncbi.nlm.nih.gov/sra/?term=SRP040006
Ntet-7586	FGSC7586	Lasiosphaeriaceae II	Neurospora	tetrasperma	L4	rcd-1+(PS)	Corcoran et al. 2016	https://www.ncbi.nlm.nih.gov/sra/?term=SRP040006
Ntet-CJ45	CJ45	Lasiosphaeriaceae II	Neurospora	tetrasperma	L5	rcd-1- (BS)	Corcoran et al. 2016	https://www.ncbi.nlm.nih.gov/sra/?term=SRP040006
Ntet-CJ46	CJ46	Lasiosphaeriaceae II	Neurospora	tetrasperma	L5	rcd-1- (BS)	Corcoran et al. 2016	https://www.ncbi.nlm.nih.gov/sra/?term=SRP040006
Ntet-10727	FGSC10727	Lasiosphaeriaceae II	Neurospora	tetrasperma	L5	rcd-1- (BS)	Corcoran et al. 2016	https://www.ncbi.nlm.nih.gov/sra/?term=SRP040006
Ntet-10728	FGSC10728	Lasiosphaeriaceae II	Neurospora	tetrasperma	L5	rcd-1- (BS)	Corcoran et al. 2016	https://www.ncbi.nlm.nih.gov/sra/?term=SRP040006
Ntet-10729	FGSC10729	Lasiosphaeriaceae II	Neurospora	tetrasperma	L5	rcd-1- (BS)	Corcoran et al. 2016	https://www.ncbi.nlm.nih.gov/sra/?term=SRP040006
Ntet-10730	FGSC10730	Lasiosphaeriaceae II	Neurospora	tetrasperma	L5	rcd-1- (BS)	Corcoran et al. 2016	https://www.ncbi.nlm.nih.gov/sra/?term=SRP040006
Ntet-10731	FGSC10731	Lasiosphaeriaceae II	Neurospora	tetrasperma	L5	rcd-1- (BS)	Corcoran et al. 2016	https://www.ncbi.nlm.nih.gov/sra/?term=SRP040006
Ntet-10732C2	FGSC10732C2	Lasiosphaeriaceae II	Neurospora	tetrasperma	L5	rcd-1+	Corcoran et al. 2016	https://www.ncbi.nlm.nih.gov/sra/?term=SRP040006
Ntet-10733H	FGSC10733H	Lasiosphaeriaceae II	Neurospora	tetrasperma	L5	rcd-1- (BS)	Corcoran et al. 2016	https://www.ncbi.nlm.nih.gov/sra/?term=SRP040006
Ntet-10734	FGSC10734	Lasiosphaeriaceae II	Neurospora	tetrasperma	L5	rcd-1- (BS)	Corcoran et al. 2016	https://www.ncbi.nlm.nih.gov/sra/?term=SRP040006
Ntet-10735	FGSC10735	Lasiosphaeriaceae II	Neurospora	tetrasperma	L5	rcd-1- (BS)	Corcoran et al. 2016	https://www.ncbi.nlm.nih.gov/sra/?term=SRP040006
Ntet-10736	FGSC10736	Lasiosphaeriaceae II	Neurospora	tetrasperma	L5	rcd-1- (BS)	Corcoran et al. 2016	https://www.ncbi.nlm.nih.gov/sra/?term=SRP040006
Ntet-10737C1	FGSC10737C1	Lasiosphaeriaceae II	Neurospora	tetrasperma	L5	rcd-1- (BS)	Corcoran et al. 2016	https://www.ncbi.nlm.nih.gov/sra/?term=SRP040006
Ntet-10738	FGSC10738	Lasiosphaeriaceae II	Neurospora	tetrasperma	L5	rcd-1- (BS)	Corcoran et al. 2016	https://www.ncbi.nlm.nih.gov/sra/?term=SRP040006
Ntet-10739C2	FGSC10739C2	Lasiosphaeriaceae II	Neurospora	tetrasperma	L5	rcd-1- (BS)	Corcoran et al. 2016	https://www.ncbi.nlm.nih.gov/sra/?term=SRP040006
Ntet-10740	FGSC10740	Lasiosphaeriaceae II	Neurospora	tetrasperma	L5	rcd-1- (BS)	Corcoran et al. 2016	https://www.ncbi.nlm.nih.gov/sra/?term=SRP040006
Ntet-10741C2	FGSC10741C2	Lasiosphaeriaceae II	Neurospora	tetrasperma	L5	rcd-1- (BS)	Corcoran et al. 2016	https://www.ncbi.nlm.nih.gov/sra/?term=SRP040006
Ntet-10742	FGSC10742	Lasiosphaeriaceae II	Neurospora	tetrasperma	L5	rcd-1- (BS)	Corcoran et al. 2016	https://www.ncbi.nlm.nih.gov/sra/?term=SRP040006
Ntet-10743	FGSC10743	Lasiosphaeriaceae II	Neurospora	tetrasperma	L5	rcd-1+	Corcoran et al. 2016	https://www.ncbi.nlm.nih.gov/sra/?term=SRP040006
Ntet-10744	FGSC10744	Lasiosphaeriaceae II	Neurospora	tetrasperma	L5	rcd-1- (BS)	Corcoran et al. 2016	https://www.ncbi.nlm.nih.gov/sra/?term=SRP040006
Ntet-10745	FGSC10745	Lasiosphaeriaceae II	Neurospora	tetrasperma	L5	rcd-1- (BS)	Corcoran et al. 2016	https://www.ncbi.nlm.nih.gov/sra/?term=SRP040006
Ntet-10746	FGSC10746	Lasiosphaeriaceae II	Neurospora	tetrasperma	L5	rcd-1- (BS)	Corcoran et al. 2016	https://www.ncbi.nlm.nih.gov/sra/?term=SRP040006
Ntet-10747	FGSC10747	Lasiosphaeriaceae II	Neurospora	tetrasperma	L5	rcd-1- (BS)	Corcoran et al. 2016	https://www.ncbi.nlm.nih.gov/sra/?term=SRP040006
Ntet-10748C1	FGSC10748C1	Lasiosphaeriaceae II	Neurospora	tetrasperma	L5	rcd-1- (BS)	Corcoran et al. 2016	https://www.ncbi.nlm.nih.gov/sra/?term=SRP040006
Ntet-10749	FGSC10749	Lasiosphaeriaceae II	Neurospora	tetrasperma	L5	rcd-1- (BS)	Corcoran et al. 2016	https://www.ncbi.nlm.nih.gov/sra/?term=SRP040006
Ntet-10750H	FGSC10750H	Lasiosphaeriaceae II	Neurospora	tetrasperma	L5	rcd-1- (BS)	Corcoran et al. 2016	https://www.ncbi.nlm.nih.gov/sra/?term=SRP040006
Ntet-P4371	P4371	Lasiosphaeriaceae II	Neurospora	tetrasperma	L5	rcd-1- (BS)	Corcoran et al. 2016	https://www.ncbi.nlm.nih.gov/sra/?term=SRP040006
Ntet-P4372	P4372	Lasiosphaeriaceae II	Neurospora	tetrasperma	L5	rcd-1+	Corcoran et al. 2016	https://www.ncbi.nlm.nih.gov/sra/?term=SRP040006
Ntet-2501	FGSC2501	Lasiosphaeriaceae II	Neurospora	tetrasperma	L7	rcd-1- (BS)	Corcoran et al. 2016	https://www.ncbi.nlm.nih.gov/sra/?term=SRP040006
Ntet-2502	FGSC2502	Lasiosphaeriaceae II	Neurospora	tetrasperma	L7	rcd-1+	Corcoran et al. 2016	https://www.ncbi.nlm.nih.gov/sra/?term=SRP040006
Ntet-9041	FGSC9041	Lasiosphaeriaceae II	Neurospora	tetrasperma	L7	rcd-1- (BS)	Corcoran et al. 2016	https://www.ncbi.nlm.nih.gov/sra/?term=SRP040006
Ntet-9042	FGSC9042	Lasiosphaeriaceae II	Neurospora	tetrasperma	L7	rcd-1- (BS)	Corcoran et al. 2016	https://www.ncbi.nlm.nih.gov/sra/?term=SRP040006
Ntet-9045	FGSC9045	Lasiosphaeriaceae II	Neurospora	tetrasperma	L7	rcd-1- (BS)	Corcoran et al. 2016	https://www.ncbi.nlm.nih.gov/sra/?term=SRP040006
Ntet-9046	FGSC9046	Lasiosphaeriaceae II	Neurospora	tetrasperma	L7	rcd-1- (BS)	Corcoran et al. 2016	https://www.ncbi.nlm.nih.gov/sra/?term=SRP040006
Ntet-9053	FGSC9053	Lasiosphaeriaceae II	Neurospora	tetrasperma	L7	rcd-1- (BS)	Corcoran et al. 2016	https://www.ncbi.nlm.nih.gov/sra/?term=SRP040006
Ntet-9054	FGSC9054	Lasiosphaeriaceae II	Neurospora	tetrasperma	L7	rcd-1- (BS)	Corcoran et al. 2016	https://www.ncbi.nlm.nih.gov/sra/?term=SRP040006
Ntet-2503	FGSC2503	Lasiosphaeriaceae II	Neurospora	tetrasperma	L8	rcd-1+	Corcoran et al. 2016	https://www.ncbi.nlm.nih.gov/sra/?term=SRP040006
Ntet-2504	FGSC2504	Lasiosphaeriaceae II	Neurospora	tetrasperma	L8	rcd-1+	Corcoran et al. 2016	https://www.ncbi.nlm.nih.gov/sra/?term=SRP040006
Ntet-2505H	FGSC2505H	Lasiosphaeriaceae II	Neurospora	tetrasperma	L8	rcd-1+	Corcoran et al. 2016	https://www.ncbi.nlm.nih.gov/sra/?term=SRP040006
Ntet-2506H	FGSC2506H	Lasiosphaeriaceae II	Neurospora	tetrasperma	L8	rcd-1+	Corcoran et al. 2016	https://www.ncbi.nlm.nih.gov/sra/?term=SRP040006
Ntet-9026	FGSC9026	Lasiosphaeriaceae II	Neurospora	tetrasperma	L8	rcd-1+	Corcoran et al. 2016	https://www.ncbi.nlm.nih.gov/sra/?term=SRP040006
Ntet-9027	FGSC9027	Lasiosphaeriaceae II	Neurospora	tetrasperma	L8	rcd-1+	Corcoran et al. 2016	https://www.ncbi.nlm.nih.gov/sra/?term=SRP040006
Ntet-9028	FGSC9028	Lasiosphaeriaceae II	Neurospora	tetrasperma	L8	rcd-1+	Corcoran et al. 2016	https://www.ncbi.nlm.nih.gov/sra/?term=SRP040006
Ntet-9029	FGSC9029	Lasiosphaeriaceae II	Neurospora	tetrasperma	L8	rcd-1+	Corcoran et al. 2016	https://www.ncbi.nlm.nih.gov/sra/?term=SRP040006
Ntet-9030	FGSC9030	Lasiosphaeriaceae II	Neurospora	tetrasperma	L8	rcd-1+	Corcoran et al. 2016	https://www.ncbi.nlm.nih.gov/sra/?term=SRP040006
Ntet-9031	FGSC9031	Lasiosphaeriaceae II	Neurospora	tetrasperma	L8	rcd-1+	Corcoran et al. 2016	https://www.ncbi.nlm.nih.gov/sra/?term=SRP040006
Ntet-9035	FGSC9035	Lasiosphaeriaceae II	Neurospora	tetrasperma	L8	rcd-1+ (PS)	Corcoran et al. 2016	https://www.ncbi.nlm.nih.gov/sra/?term=SRP040006
Ntet-9036	FGSC9036	Lasiosphaeriaceae II	Neurospora	tetrasperma	L8	rcd-1+	Corcoran et al. 2016	https://www.ncbi.nlm.nih.gov/sra/?term=SRP040006
Ntet-9039	FGSC9039	Lasiosphaeriaceae II	Neurospora	tetrasperma	L8	rcd-1+	Corcoran et al. 2016	https://www.ncbi.nlm.nih.gov/sra/?term=SRP040006
Ntet-9040	FGSC9040	Lasiosphaeriaceae II	Neurospora	tetrasperma	L8	rcd-1+	Corcoran et al. 2016	https://www.ncbi.nlm.nih.gov/sra/?term=SRP040006
Ntet-9043	FGSC9043	Lasiosphaeriaceae II	Neurospora	tetrasperma	L8	rcd-1+	Corcoran et al. 2016	https://www.ncbi.nlm.nih.gov/sra/?term=SRP040006
Ntet-9044	FGSC9044	Lasiosphaeriaceae II	Neurospora	tetrasperma	L8	rcd-1+	Corcoran et al. 2016	https://www.ncbi.nlm.nih.gov/sra/?term=SRP040006
Ntet-9047	FGSC9047	Lasiosphaeriaceae II	Neurospora	tetrasperma	L8	rcd-1+	Corcoran et al. 2016	https://www.ncbi.nlm.nih.gov/sra/?term=SRP040006
Ntet-9048	FGSC9048	Lasiosphaeriaceae II	Neurospora	tetrasperma	L8	rcd-1+	Corcoran et al. 2016	https://www.ncbi.nlm.nih.gov/sra/?term=SRP040006
Ntet-9049	FGSC9049	Lasiosphaeriaceae II	Neurospora	tetrasperma	L8	rcd-1+	Corcoran et al. 2016	https://www.ncbi.nlm.nih.gov/sra/?term=SRP040006
Ntet-9050	FGSC9050	Lasiosphaeriaceae II	Neurospora	tetrasperma	L8	rcd-1+	Corcoran et al. 2016	https://www.ncbi.nlm.nih.gov/sra/?term=SRP040006
Ntet-9051	FGSC9051	Lasiosphaeriaceae II	Neurospora	tetrasperma	L8	rcd-1+	Corcoran et al. 2016	https://www.ncbi.nlm.nih.gov/sra/?term=SRP040006
Ntet-9052	FGSC9052	Lasiosphaeriaceae II	Neurospora	tetrasperma	L8	rcd-1+	Corcoran et al. 2016	https://www.ncbi.nlm.nih.gov/sra/?term=SRP040006
Ntet-10751	FGSC10751	Lasiosphaeriaceae II	Neurospora	tetrasperma	L9	rcd-1- (BS)	Corcoran et al. 2016	https://www.ncbi.nlm.nih.gov/sra/?term=SRP040006
Ntet-10752	FGSC10752	Lasiosphaeriaceae II	Neurospora	tetrasperma	L9	rcd-1- (BS)	Corcoran et al. 2016	https://www.ncbi.nlm.nih.gov/sra/?term=SRP040006
Podan-10383	FGSC10383	Lasiosphaeriaceae IV	Podospora	anserina		rcd-1+	Espagne et al. 2008	https://www.ncbi.nlm.nih.gov/bioproject/29799
Podcu-TEP21a	TEP21a	Lasiosphaeriaceae I	Podospora	curvicolla		rcd-1- (NH)	Peay & Martin, unpublished
Scyth-CBS625.91	CBS625.91	Chaetomiaceae	Scytalidium	thermophilum		rcd-1- (NH)	Morgenstern et al. 2012
Sorma-khell	khell	Lasiosphaeriaceae II	Sordaria	macrospora		rcd-1+	Nowrousian et al. 2010	https://www.ncbi.nlm.nih.gov/assembly/GCA_000182805.2
Thian-CBS123565	CBS123565	Chaetomiaceae	Thielavia	antarctica		rcd-1- (NH)	Powell, Natvig et al. Unpublished
Thiap-CBS731.68	CBS731.68	Chaetomiaceae	Thielavia	appendiculata		rcd-1- (NH)	Powell, Natvig et al. Unpublished
Thiar-CBS508.74	CBS508.74	Chaetomiaceae	Thielavia	arenaria		rcd-1+	Powell, Natvig et al. Unpublished
Thihy-CBS757.83	CBS757.83	Chaetomiaceae	Thielavia	hyrcaniae		rcd-1+ (2)	Powell, Natvig et al. Unpublished
